# Supplementary material for: Increased ERCC1 expression is linked to chromosomal aberrations and adverse tumor biology in prostate cancer
Source: Springer Nature journal article supplement (doi:10.1186/s12885-017-3489-9), 2017-07-26
Supplement: MOESM1 [file 13330580]

**Table S1** Association between ERCC1 immunostaining results and prostate cancer phenotype in ERG-negative tumors

| Parameter                       | n<br>evaluable | ERCC1        |          |              |            | p value |
|---------------------------------|----------------|--------------|----------|--------------|------------|---------|
|                                 |                | negative (%) | weak (%) | moderate (%) | strong (%) |         |
| <b>All cancers</b>              | 5,078          | 47.4         | 33.6     | 15.7         | 3.3        |         |
| <b>Tumor stage</b>              |                |              |          |              |            |         |
| pT2                             | 3,432          | 49.2         | 33.4     | 14.5         | 2.9        | <0.0001 |
| pT3a                            | 1,007          | 47.0         | 32.3     | 17.2         | 3.6        |         |
| pT3b-pT4                        | 624            | 38.0         | 37.0     | 19.7         | 5.3        |         |
| <b>Gleason grade</b>            |                |              |          |              |            |         |
| ≤3+3                            | 1,050          | 61.0         | 27.1     | 10.4         | 1.5        | <0.0001 |
| 3+4                             | 2,695          | 48.0         | 34.4     | 14.9         | 2.8        |         |
| 3+4 Tert.5                      | 224            | 44.6         | 34.4     | 17.9         | 3.1        |         |
| 4+3                             | 533            | 36.0         | 36.8     | 21.4         | 5.8        |         |
| 4+3 Tert.5                      | 301            | 30.2         | 40.2     | 21.9         | 7.6        |         |
| ≥4+4                            | 271            | 32.8         | 36.9     | 24.4         | 5.9        |         |
| <b>Lymph node metastasis</b>    |                |              |          |              |            |         |
| N0                              | 2,944          | 44.5         | 35.2     | 16.5         | 3.7        | 0.0025  |
| N+                              | 275            | 35.3         | 36.0     | 21.8         | 6.9        |         |
| <b>Preop. PSA level (ng/ml)</b> |                |              |          |              |            |         |
| <4                              | 533            | 44.8         | 35.3     | 15.4         | 4.5        | 0.1597  |
| 4-10                            | 2,998          | 47.3         | 34.5     | 15.3         | 2.9        |         |
| 10-20                           | 1,105          | 48.5         | 31.8     | 16.6         | 3.2        |         |
| >20                             | 399            | 47.9         | 30.8     | 16.0         | 5.3        |         |
| <b>Surgical margin</b>          |                |              |          |              |            |         |
| negative                        | 4,042          | 47.6         | 33.9     | 15.4         | 3.0        | 0.0853  |
| positive                        | 948            | 45.8         | 32.5     | 17.4         | 4.3        |         |

**Table S2** Association between ERCC1 immunostaining results and prostate cancer phenotype in ERG-positive tumors

| Parameter                       | n<br>evaluable | ERCC1        |          |              |            | p value |
|---------------------------------|----------------|--------------|----------|--------------|------------|---------|
|                                 |                | negative (%) | weak (%) | moderate (%) | strong (%) |         |
| <b>All cancers</b>              | 4,067          | 18.6         | 41.4     | 32.2         | 7.8        |         |
| <b>Tumor stage</b>              |                |              |          |              |            |         |
| pT2                             | 2,427          | 20.9         | 42.9     | 29.3         | 6.8        | <0.0001 |
| pT3a                            | 1,072          | 16.6         | 38.2     | 35.2         | 10.1       |         |
| pT3b-pT4                        | 552            | 11.8         | 41.3     | 39.1         | 7.8        |         |
| <b>Gleason grade</b>            |                |              |          |              |            |         |
| ≤3+3                            | 867            | 26.9         | 41.9     | 25.6         | 5.7        | <0.0001 |
| 3+4                             | 2,307          | 17.8         | 41.5     | 32.6         | 8.1        |         |
| 3+4 Tert.5                      | 120            | 11.7         | 51.7     | 30.8         | 5.8        |         |
| 4+3                             | 399            | 12.3         | 39.6     | 38.1         | 10.0       |         |
| 4+3 Tert.5                      | 225            | 12.4         | 40.9     | 38.7         | 8.0        |         |
| ≥4+4                            | 147            | 12.9         | 36.1     | 40.1         | 10.9       |         |
| <b>Lymph node metastasis</b>    |                |              |          |              |            |         |
| N0                              | 2,311          | 16.1         | 40.8     | 34.0         | 9.1        | 0.3736  |
| N+                              | 251            | 13.1         | 44.2     | 35.5         | 7.2        |         |
| <b>Preop. PSA level (ng/ml)</b> |                |              |          |              |            |         |
| <4                              | 571            | 20.1         | 44.5     | 28.9         | 6.5        | 0.0170  |
| 4-10                            | 2,472          | 18.8         | 42.1     | 31.3         | 7.8        |         |
| 10-20                           | 730            | 18.4         | 37.0     | 36.2         | 8.5        |         |
| >20                             | 245            | 13.5         | 40.4     | 38.0         | 8.2        |         |
| <b>Surgical margin</b>          |                |              |          |              |            |         |
| negative                        | 3,184          | 19.5         | 41.9     | 30.9         | 7.6        | 0.0030  |
| positive                        | 808            | 15.5         | 39.5     | 36.9         | 8.2        |         |
